# Supplementary material for: IBA-1+CD68+ Germinal Center Macrophages Harbor Proviral and Inducible Clade C HIV Reservoirs in ART-Suppressed Human Lymph Nodes
Source: Research Square preprint supplement (doi:10.21203/rs.3.rs-8406328/v1), 2026-01-07
Supplement: Supplementary file 1 [file 018d8abd27cb740fbceb118b.pdf]

**Supplementary Table 1. Participant demographics and clinical data.** MID: participant ID uniquely assigned for this report to deidentify participants. PLWH: P; PLWoH: N. PLWH were classified by ART initiation status as UTx (Untreated): Not on ART at time of enrolment; acute: treated during Fiebig stages I-V; chronic: treated after Fiebig stage V and UN (unknown treatment status). n/a – not-applicable/ data not available.

| MID | HIV status | Treatment status | Age | Gender | No. of days on treatment before LN excision | Plasma Viral load (cps/ml) nearest to LN excision | CD4 count (cells/ul) closest to LN excision | Figure 1 and Supplementary Fig. S1&S3 | Figure 2 and Supplementary Fig. S4-S6 | Figure 3 and Supplementary Fig.S7 | Figure 4 and Supplementary Fig. 8 | Figure 5 and Supplementary Fig. 8 |
|-----|------------|------------------|-----|--------|---------------------------------------------|---------------------------------------------------|---------------------------------------------|---------------------------------------|---------------------------------------|-----------------------------------|-----------------------------------|-----------------------------------|
| M01 | N          | n/a              | 20  | F      | n/a                                         | n/a                                               | 1143                                        | X                                     |                                       |                                   |                                   |                                   |
| M02 | N          | n/a              | 24  | F      | n/a                                         | n/a                                               | 928                                         | X                                     |                                       |                                   |                                   |                                   |
| M03 | N          | n/a              | 25  | F      | n/a                                         | n/a                                               | 667                                         | X                                     |                                       |                                   |                                   |                                   |
| M04 | N          | n/a              | 22  | F      | n/a                                         | n/a                                               | 874                                         | X                                     |                                       | X                                 |                                   |                                   |
| M05 | N          | n/a              | 21  | F      | n/a                                         | n/a                                               | 1039                                        | X                                     |                                       |                                   |                                   |                                   |
| M06 | N          | n/a              | 22  | F      | n/a                                         | n/a                                               | 659                                         | X                                     |                                       |                                   |                                   |                                   |
| M07 | N          | n/a              | 24  | F      | n/a                                         | n/a                                               | 704                                         | X                                     |                                       |                                   |                                   |                                   |
| M08 | N          | n/a              | 20  | F      | n/a                                         | n/a                                               | 964                                         | X                                     |                                       |                                   |                                   |                                   |
| M09 | N          | n/a              | 22  | F      | n/a                                         | n/a                                               | 670                                         |                                       |                                       | X                                 |                                   |                                   |
| M10 | N          | n/a              | 19  | F      | n/a                                         | n/a                                               | 984                                         |                                       |                                       | X                                 |                                   |                                   |
| M11 | N          | n/a              | 20  | F      | n/a                                         | n/a                                               | 794                                         |                                       |                                       |                                   | X                                 |                                   |
| M12 | N          | n/a              | 19  | F      | n/a                                         | n/a                                               | 765                                         |                                       |                                       |                                   | X                                 |                                   |
| M13 | N          | n/a              | 21  | F      | n/a                                         | n/a                                               | 1304                                        |                                       | X                                     |                                   | X                                 |                                   |
| M14 | N          | n/a              | 23  | F      | n/a                                         | n/a                                               | 1241                                        |                                       |                                       |                                   | X                                 |                                   |
| M15 | N          | n/a              | 24  | F      | n/a                                         | <20                                               | 1221                                        |                                       | X                                     |                                   |                                   |                                   |
| M16 | N          | n/a              | 23  | F      | n/a                                         | <20                                               | 760                                         |                                       | X                                     |                                   |                                   |                                   |
| M17 | N          | n/a              | 22  | F      | n/a                                         | <20                                               | 652                                         |                                       |                                       |                                   |                                   | X                                 |
| M18 | N          | n/a              | 21  | F      | n/a                                         | <20                                               | 627                                         |                                       |                                       |                                   |                                   | X                                 |
| M19 | N          | n/a              | 19  | F      | n/a                                         | <20                                               | 673                                         |                                       |                                       |                                   |                                   | X                                 |
| M20 | P          | acute            | 25  | F      | 385                                         | <20                                               | 898                                         | X                                     |                                       |                                   |                                   |                                   |
| M21 | P          | acute            | 22  | F      | 120                                         | <20                                               | 942                                         | X                                     | X                                     |                                   |                                   |                                   |
| M22 | P          | acute            | 27  | F      | 1647                                        | <20                                               | 1168                                        |                                       | X                                     |                                   |                                   |                                   |
| M23 | P          | acute            | 24  | F      | 926                                         | <20                                               | 1033                                        |                                       |                                       |                                   | X                                 |                                   |
| M24 | P          | acute            | 25  | F      | 760                                         | <20                                               | 444                                         |                                       |                                       |                                   | X                                 |                                   |
| M25 | P          | acute            | 28  | F      | 3359                                        | 21857                                             | 1017                                        |                                       |                                       |                                   |                                   | X                                 |
| M26 | P          | chronic          | 23  | F      | 85                                          | <20                                               | 406                                         | X                                     | X                                     |                                   |                                   |                                   |
| M27 | P          | chronic          | 19  | F      | 151                                         | 2300                                              | 708                                         | X                                     |                                       |                                   |                                   |                                   |
| M28 | P          | chronic          | 23  | F      | 17                                          | 370                                               | 624                                         | X                                     | X                                     |                                   | X                                 |                                   |

*Note: table is continued on the next page*

| MID              | HIV status | Treatment status | Age | Gender | No. of days on treatment before LN excision | Plasma Viral load (cps/ml) nearest to LN excision | CD4 count (cells/ul) closest to LN excision | Figure 1 and Supplementary Fig. S1&S3 | Figure 2 and Supplementary Fig. S4-S6 | Figure 3 and Supplementary Fig. S7 | Figure 4 and Supplementary Fig. 8 | Figure 5 and Supplementary Fig. 8 |
|------------------|------------|------------------|-----|--------|---------------------------------------------|---------------------------------------------------|---------------------------------------------|---------------------------------------|---------------------------------------|------------------------------------|-----------------------------------|-----------------------------------|
| M29              | P          | chronic          | 21  | F      | 35                                          | 59                                                | 1369                                        | X                                     | X                                     |                                    |                                   |                                   |
| M30              | P          | chronic          | 20  | M      | 174                                         | <20                                               | 599                                         | X                                     |                                       |                                    | X                                 |                                   |
| M31              | P          | chronic          | 23  | F      | 10                                          | 140                                               | 733                                         | X                                     |                                       |                                    |                                   |                                   |
| M32              | P          | chronic          | 23  | F      | 104                                         | 11000                                             | 639                                         |                                       | X                                     |                                    |                                   |                                   |
| M33              | P          | chronic          | 22  | M      | 115                                         | <20                                               | 834                                         | X                                     | X                                     |                                    |                                   |                                   |
| M34              | P          | chronic          | 22  | F      | 9                                           | 180                                               | 472                                         | X                                     |                                       |                                    |                                   |                                   |
| M35              | P          | chronic          | 36  | F      | 3810                                        | 5478                                              | 409                                         |                                       | X                                     | X                                  |                                   |                                   |
| M36              | P          | chronic          | 28  | F      | 2454                                        | <20                                               | 656                                         |                                       |                                       | X                                  |                                   |                                   |
| M37              | P          | chronic          | 21  | F      | 747                                         | <20                                               | 323                                         |                                       |                                       |                                    | X                                 |                                   |
| M38 <sup>a</sup> | P          | chronic          | 30  | F      | 1907                                        | 6000                                              | 555                                         | X                                     | X                                     |                                    | X                                 |                                   |
| M38 <sup>b</sup> | P          | chronic          | 33  | F      | 3130                                        | 2359                                              | 897                                         |                                       | X                                     |                                    |                                   |                                   |
| M39              | P          | chronic          | 23  | F      | 39                                          | 3000                                              | 554                                         | X                                     | X                                     |                                    | X                                 |                                   |
| M40              | P          | chronic          | 26  | M      | 1014                                        | <20                                               | 406                                         | X                                     |                                       |                                    |                                   |                                   |
| M41              | P          | chronic          | 28  | F      | 143                                         | <20                                               | 856                                         | X                                     |                                       |                                    |                                   |                                   |
| M42              | P          | chronic          | 28  | F      | 1002                                        | <20                                               | 847                                         | X                                     |                                       |                                    |                                   |                                   |
| M43              | P          | chronic          | 21  | F      | 186                                         | <20                                               | 225                                         | X                                     |                                       |                                    | X                                 |                                   |
| M44 <sup>a</sup> | P          | chronic          | 32  | F      | 3001                                        | <20                                               | 751                                         |                                       |                                       |                                    |                                   | X                                 |
| M44 <sup>b</sup> | P          | chronic          | 33  | F      | 3256                                        | 1363                                              | 423                                         |                                       |                                       | X                                  |                                   |                                   |
| M45              | P          | chronic          | 33  | F      | 3297                                        | <20                                               | 618                                         |                                       |                                       | X                                  |                                   |                                   |
| M46              | P          | chronic          | 20  | F      | 37                                          | 290                                               | 521                                         |                                       |                                       |                                    | X                                 |                                   |
| M47              | P          | chronic          | 33  | F      | 2807                                        | <30                                               | 846                                         |                                       |                                       |                                    |                                   | X                                 |
| M48 <sup>a</sup> | P          | chronic          | 26  | F      | 2170                                        | 580                                               | 785                                         |                                       |                                       |                                    |                                   | X                                 |
| M48 <sup>b</sup> | P          | chronic          | 28  | F      | 2775                                        | <20                                               | 857                                         |                                       | X                                     | X                                  | X                                 |                                   |
| M49              | P          | chronic          | 33  | F      | 3479                                        | <30                                               | 969                                         |                                       | X                                     |                                    |                                   | X                                 |
| M50              | P          | chronic          | 19  | F      | 79                                          | <20                                               | 467                                         |                                       | X                                     |                                    |                                   |                                   |
| M51              | P          | chronic          | 40  | F      | 2496                                        | <20                                               | 751                                         |                                       |                                       | X                                  |                                   |                                   |
| M52              | P          | chronic          | 28  | F      | n/a                                         | <20                                               | 851                                         |                                       |                                       | X                                  |                                   |                                   |
| M53              | P          | UTx              | 45  | F      | n/a                                         | 2488                                              | 45                                          |                                       |                                       | X                                  |                                   |                                   |
| M54              | P          | UTx              | 29  | M      | n/a                                         | 400000                                            | 251                                         |                                       | X                                     |                                    |                                   |                                   |
| M55              | P          | UN               | 22  | F      | n/a                                         | <20                                               | 883                                         | X                                     |                                       |                                    |                                   |                                   |
| M56              | P          | UN               | 38  | F      | n/a                                         | <20                                               | 741                                         | X                                     |                                       |                                    |                                   |                                   |
| M57              | P          | UN               | 61  | F      | n/a                                         | <20                                               | 375                                         | X                                     |                                       |                                    |                                   |                                   |
| M58              | P          | UN               | 44  | F      | n/a                                         | n/a                                               | n/a                                         | X                                     |                                       |                                    |                                   |                                   |

<sup>a,b</sup> Repeat biopsies for the same donor at different timepoints and/or clinical states (only three study donors) are indicated by “a” or “b”



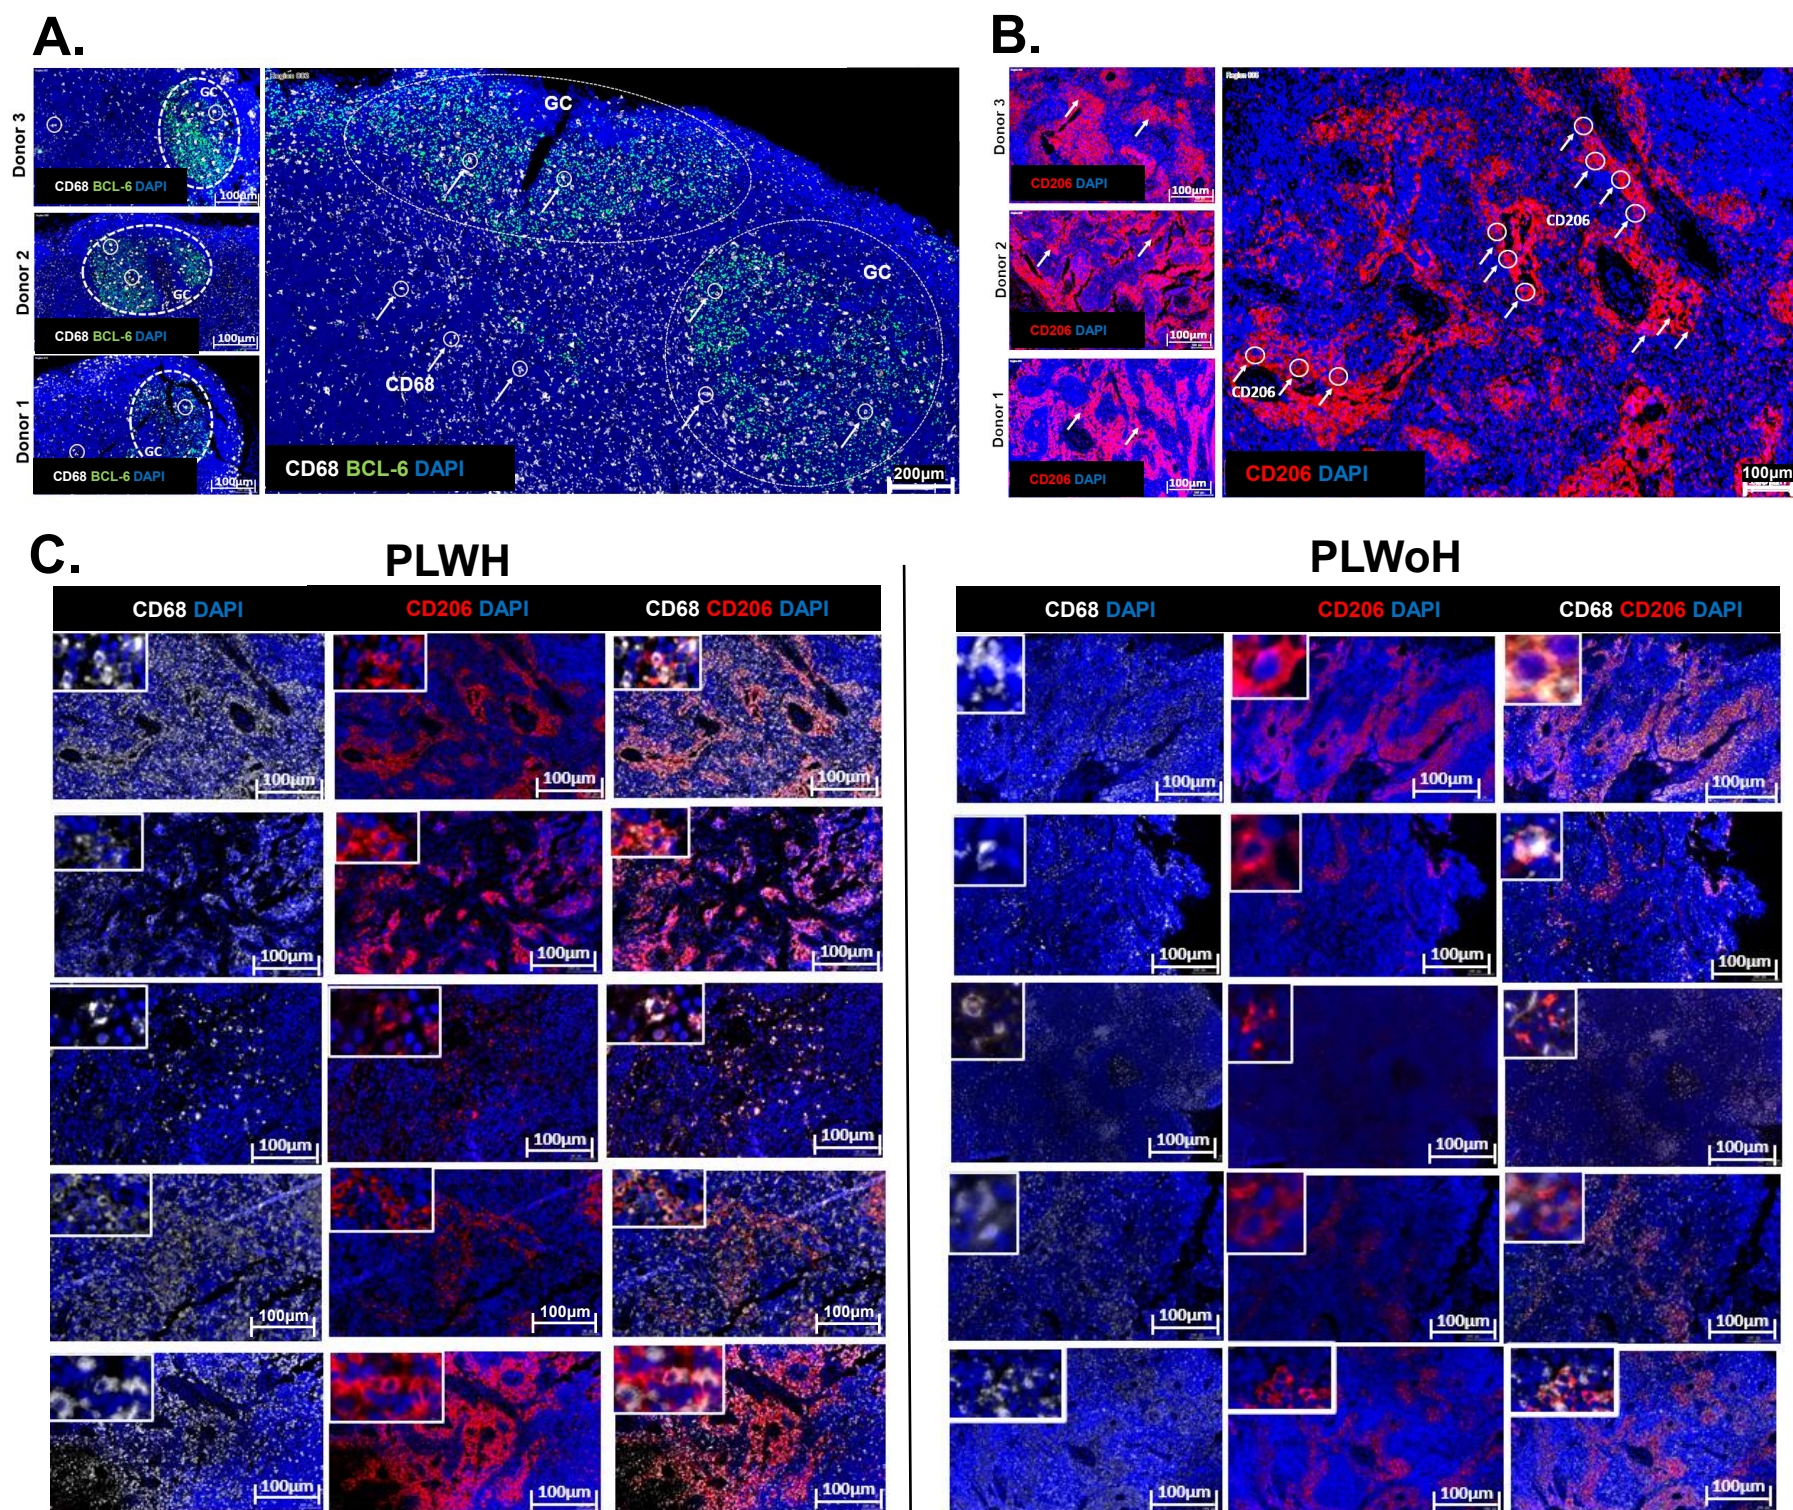

**Supplementary Figure 1. Macrophage phenotyping and localization.** (A) The localization of CD68<sup>+</sup> (white) macrophages relative to the LN GC indicated by BCL-6 (green) positivity from n=3 LN tissue donors. The white dashed oval defines the GC. (B) Representative multicolor IF images from n=3 LN tissue donors of CD206<sup>+</sup> (red) macrophages along LN lymphatic and blood vessels (white arrows). (C) Representative multicolor IF images from n=5 PLWH and n=5 PLWoH of CD68<sup>+</sup> (white) and CD206<sup>+</sup> (red) macrophages. Images acquired at 40x and all cell nuclei were stained with DAPI (blue). Scale bars= 100µm and 200µm.



A.

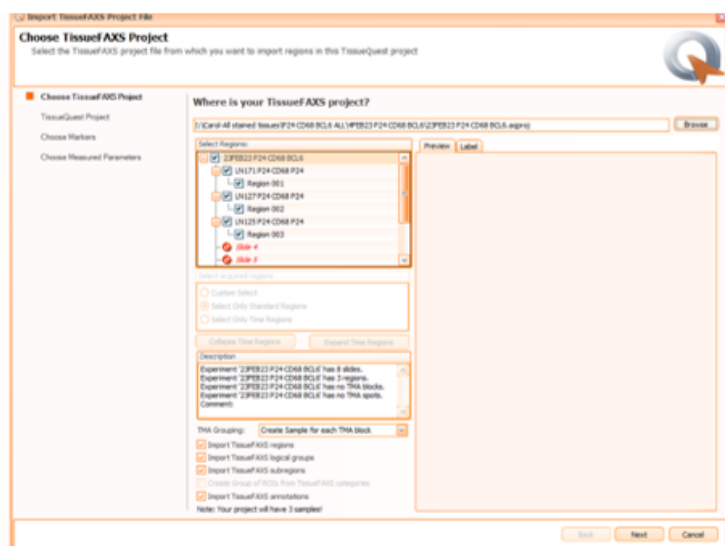

Files of stained tissue sections are uploaded to TissueQuest software

B.

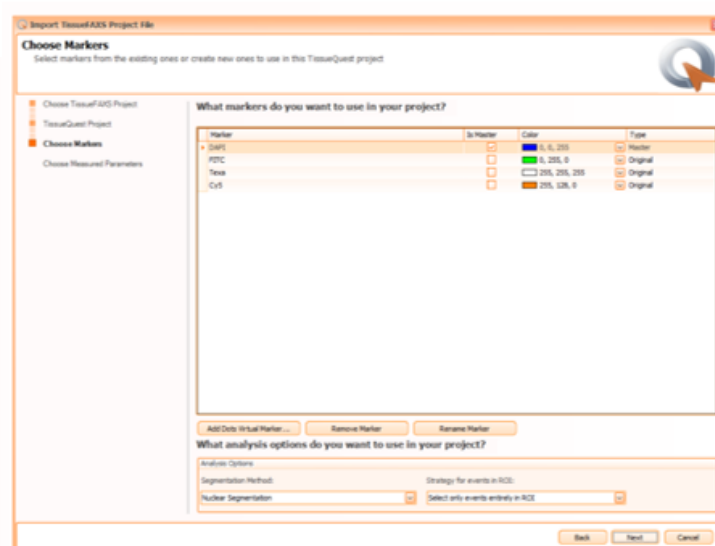

The nuclear segmentation method is selected and DAPI is used as the master channel. The parameters for the other channels including FITC, Texas Red and Cy5 are set.

D.

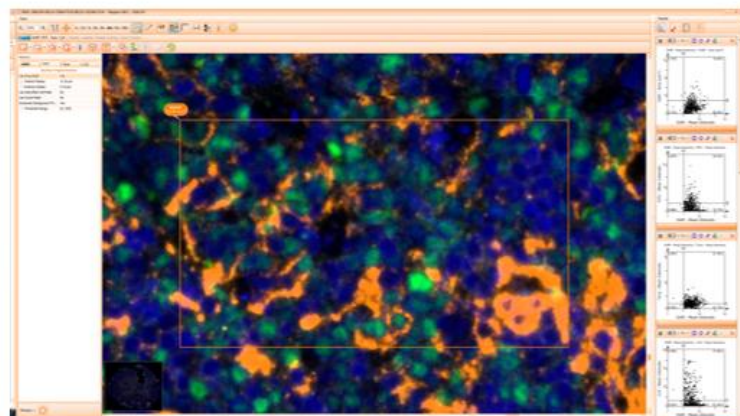

Selected ROIs are analyzed and single cell data is generated for all channels used

C.

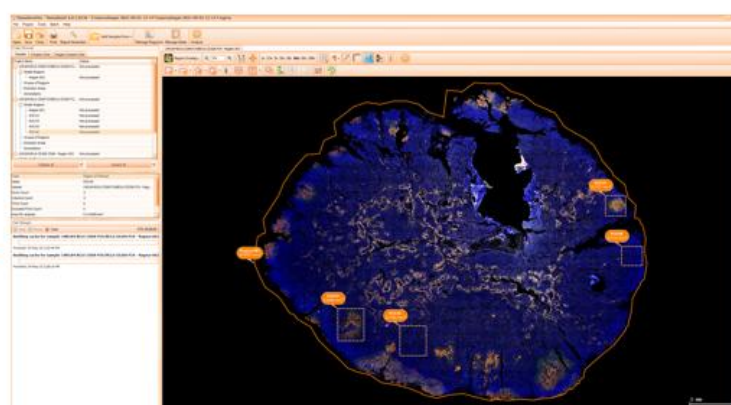

Different regions of interest (ROIs) are selected using a free-hand drawing tool

E.

| File Home Insert Page Layout Formulas Data Review View Automate Help |                                      |                    |         |            |
|----------------------------------------------------------------------|--------------------------------------|--------------------|---------|------------|
| Tahoma 8 A* A*                                                       |                                      |                    |         |            |
| B I U [Grid Icon] [Color Icon] [Text Icon]                           |                                      |                    |         |            |
| Clipboard Font Alignment Number                                      |                                      |                    |         |            |
| D1 [X] [Check] [fx] CD206 CD68                                       |                                      |                    |         |            |
|                                                                      | A                                    | B                  | C       | D          |
| 1                                                                    | Sample                               | Region Of Interest | CD206   | CD206 CD68 |
| 2                                                                    | LN0170 BCL6 CD206 CD68 - Regi ROI 02 |                    | 4150,33 | 4088,29    |
| 3                                                                    | LN0170 BCL6 CD206 CD68 - Regi ROI 03 |                    | 589,37  | 589,37     |
| 4                                                                    | LN0170 BCL6 CD206 CD68 - Regi ROI 04 |                    | 3066,60 | 3066,60    |
| 5                                                                    | LN0170 BCL6 CD206 CD68 - Regi ROI 05 |                    | 67,46   | 74,21      |
| 6                                                                    | LN0170 BCL6 CD206 CD68 - Regi ROI 06 |                    | 9368,00 | 9368,00    |
| 7                                                                    | LN096 BCL6 CD206 CD68 - Regi ROI 05  |                    | 4960,02 | 3150,10    |
| 8                                                                    | LN096 BCL6 CD206 CD68 - Regi ROI 06  |                    | 6518,86 | 3733,08    |
| 9                                                                    | LN096 BCL6 CD206 CD68 - Regi ROI 07  |                    | 6855,08 | 4328,48    |
| 10                                                                   | LN096 BCL6 CD206 CD68 - Regi ROI 08  |                    | 3411,10 | 1520,53    |

Generated results are exported as excel files and analyzed using GraphPad prism

**Supplementary Figure 2. TissueQuest image analysis summary.** Summary of quantitative image analysis by TissueQuest.



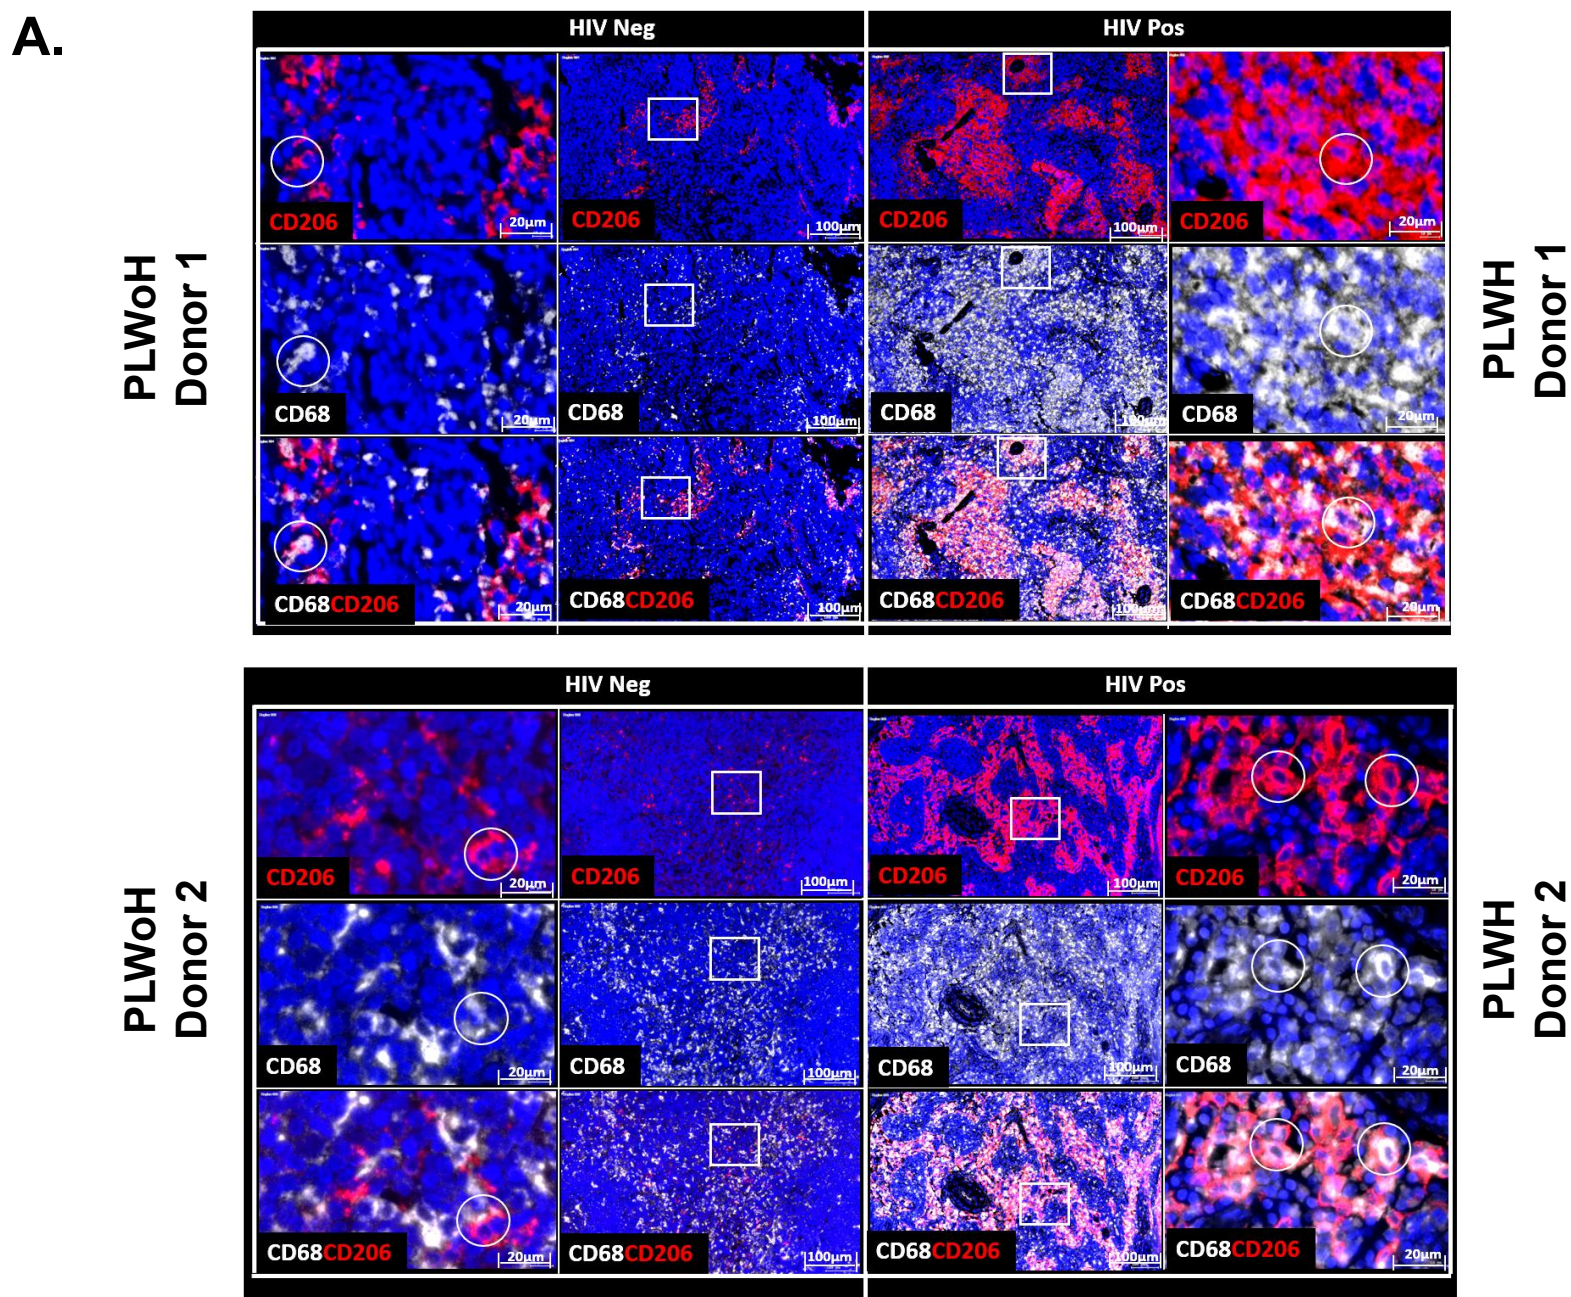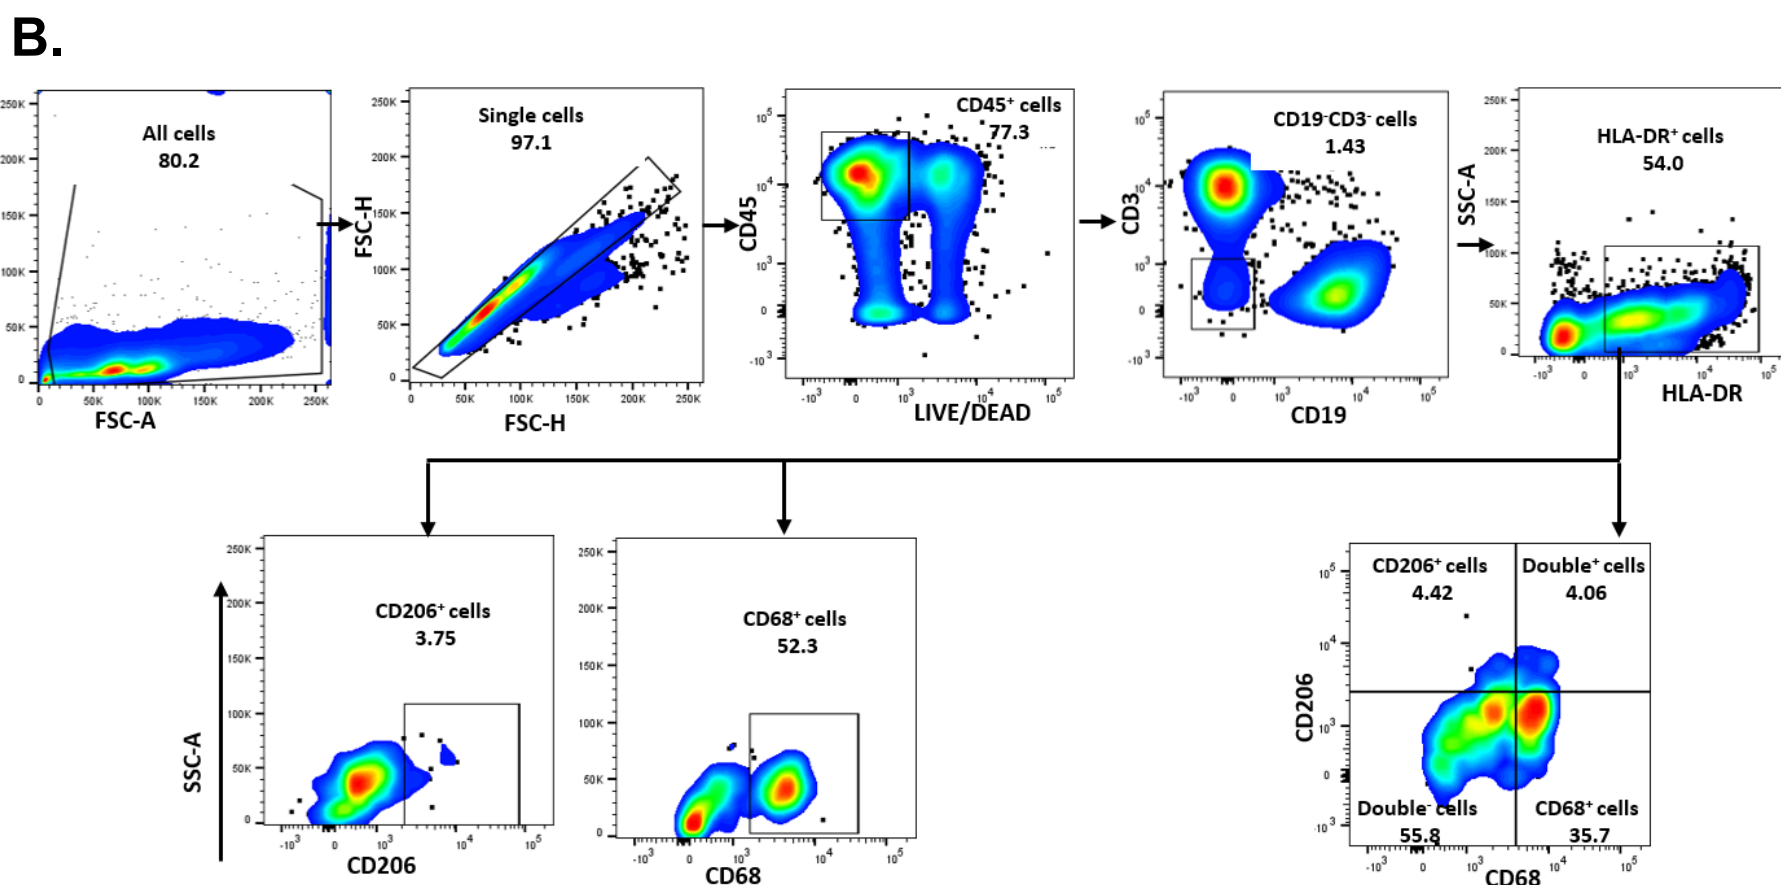

**Supplementary Figure 3. HIV modulates macrophage frequency.** (A) Multicolor IF images of the individual channels of CD206<sup>+</sup> macrophages (red), CD68<sup>+</sup> macrophages (white), and the composite image of CD68<sup>+</sup>CD206<sup>+</sup> macrophages and nuclei counterstained with DAPI (blue) in LN tissue sections from n=2 representative PLWoH and n=2 representative PLWH. The white rectangles from the inner panels indicate regions of interest which are further magnified on the outer panels. The white circles indicate double positive CD68<sup>+</sup>CD206<sup>+</sup> macrophages. Images were acquired at 40x. Scale bars= 100µm and 20µm. (B) Flow cytometry gating strategy of CD206<sup>+</sup>, CD68<sup>+</sup> and CD68<sup>+</sup>CD206<sup>+</sup> macrophages from LNMCs.



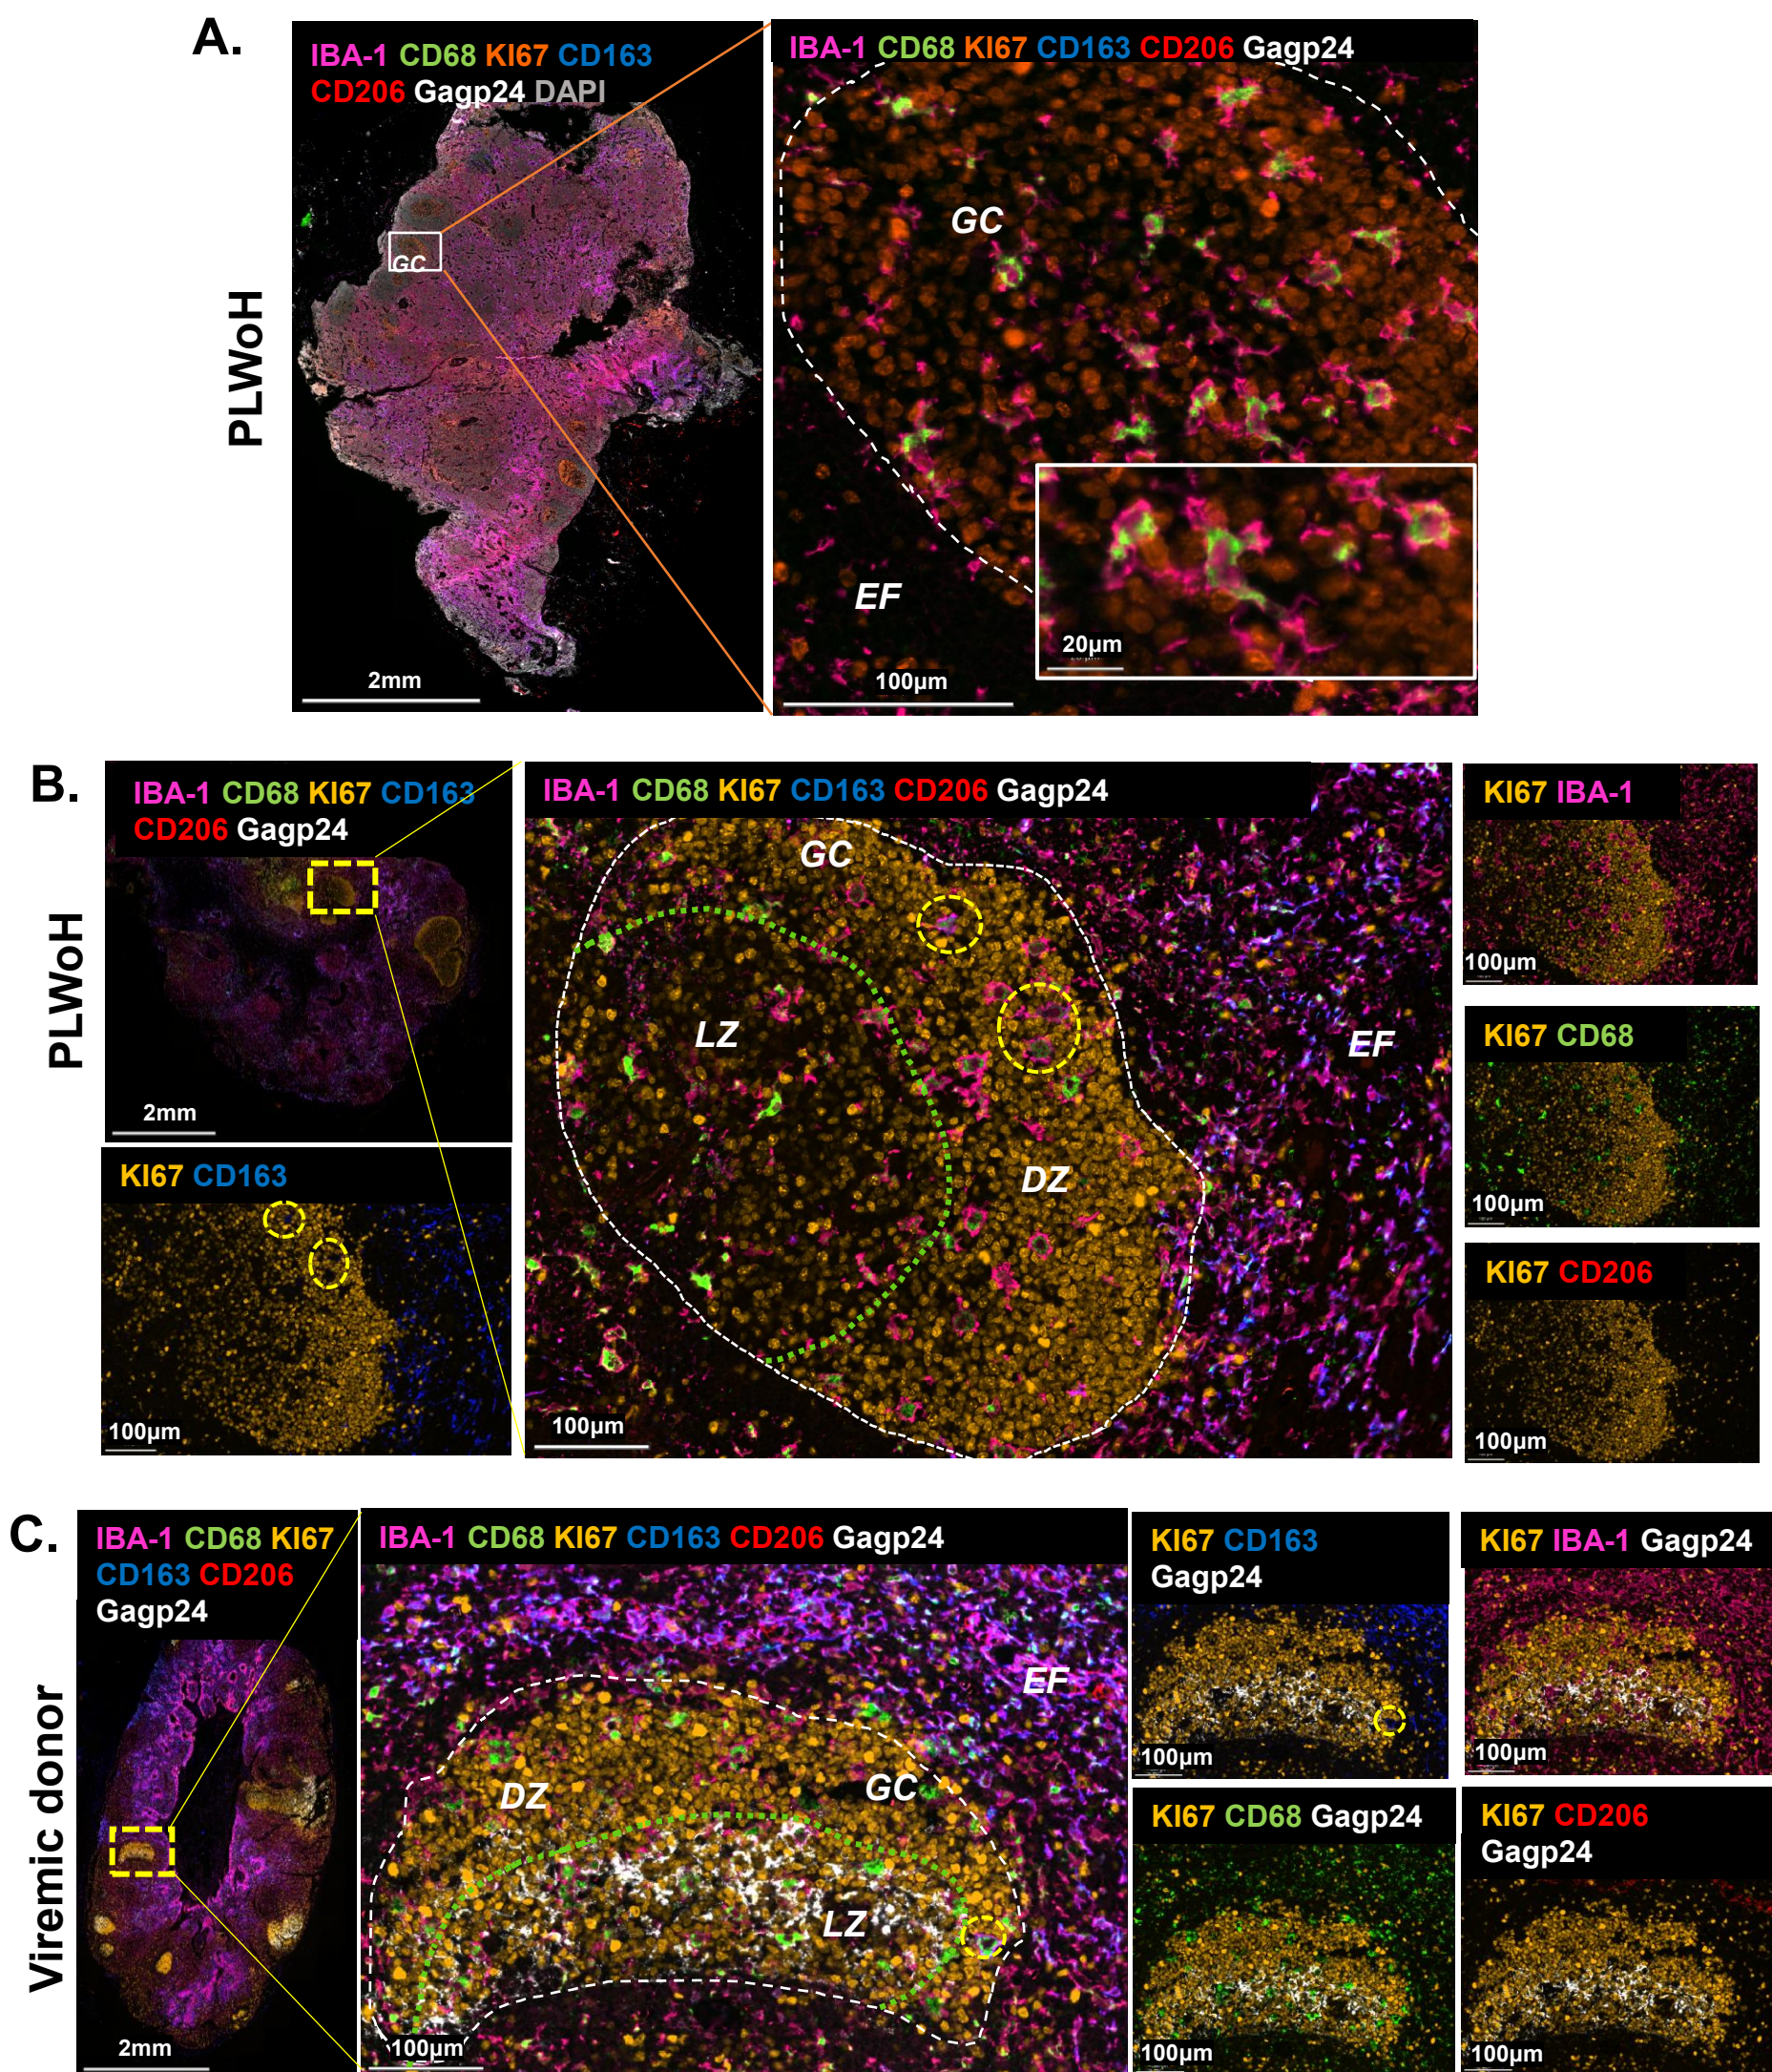

**Supplementary Figure 4. GC macrophage phenotyping by Lunaphore COMET.** (A) Multicolor IF merged image of a whole lymph node from a PLWoH (left) obtained from the Lunaphore COMET showing IBA-1 (pink), CD68 (green), KI67 (orange), CD163 (dark blue), CD206 (red), Gagp24 (white) and nuclei counterstained with DAPI (grey). The right inset shows a magnified GC denoted by KI67 positivity, with IBA-1<sup>+</sup>CD68<sup>+</sup> GC macrophages further magnified (bottom right). (B-C) Multicolor IF merged and individual channel images of whole LN tissue sections (left) and magnified GCs showing macrophage phenotypes from (B) a PLWoH and (C) a viremic PLWH. The white dashed line defined the GC and the green dotted line defines the light zone (LZ) and dark zone (DZ). The yellow circles indicate the IBA-1<sup>+</sup>CD68<sup>+</sup>CD206<sup>+</sup>CD163<sup>+</sup> GC macrophages. Images were acquired at 20x. Scale bars= 2mm, 100µm and 20µm



A. Virally suppressed donor

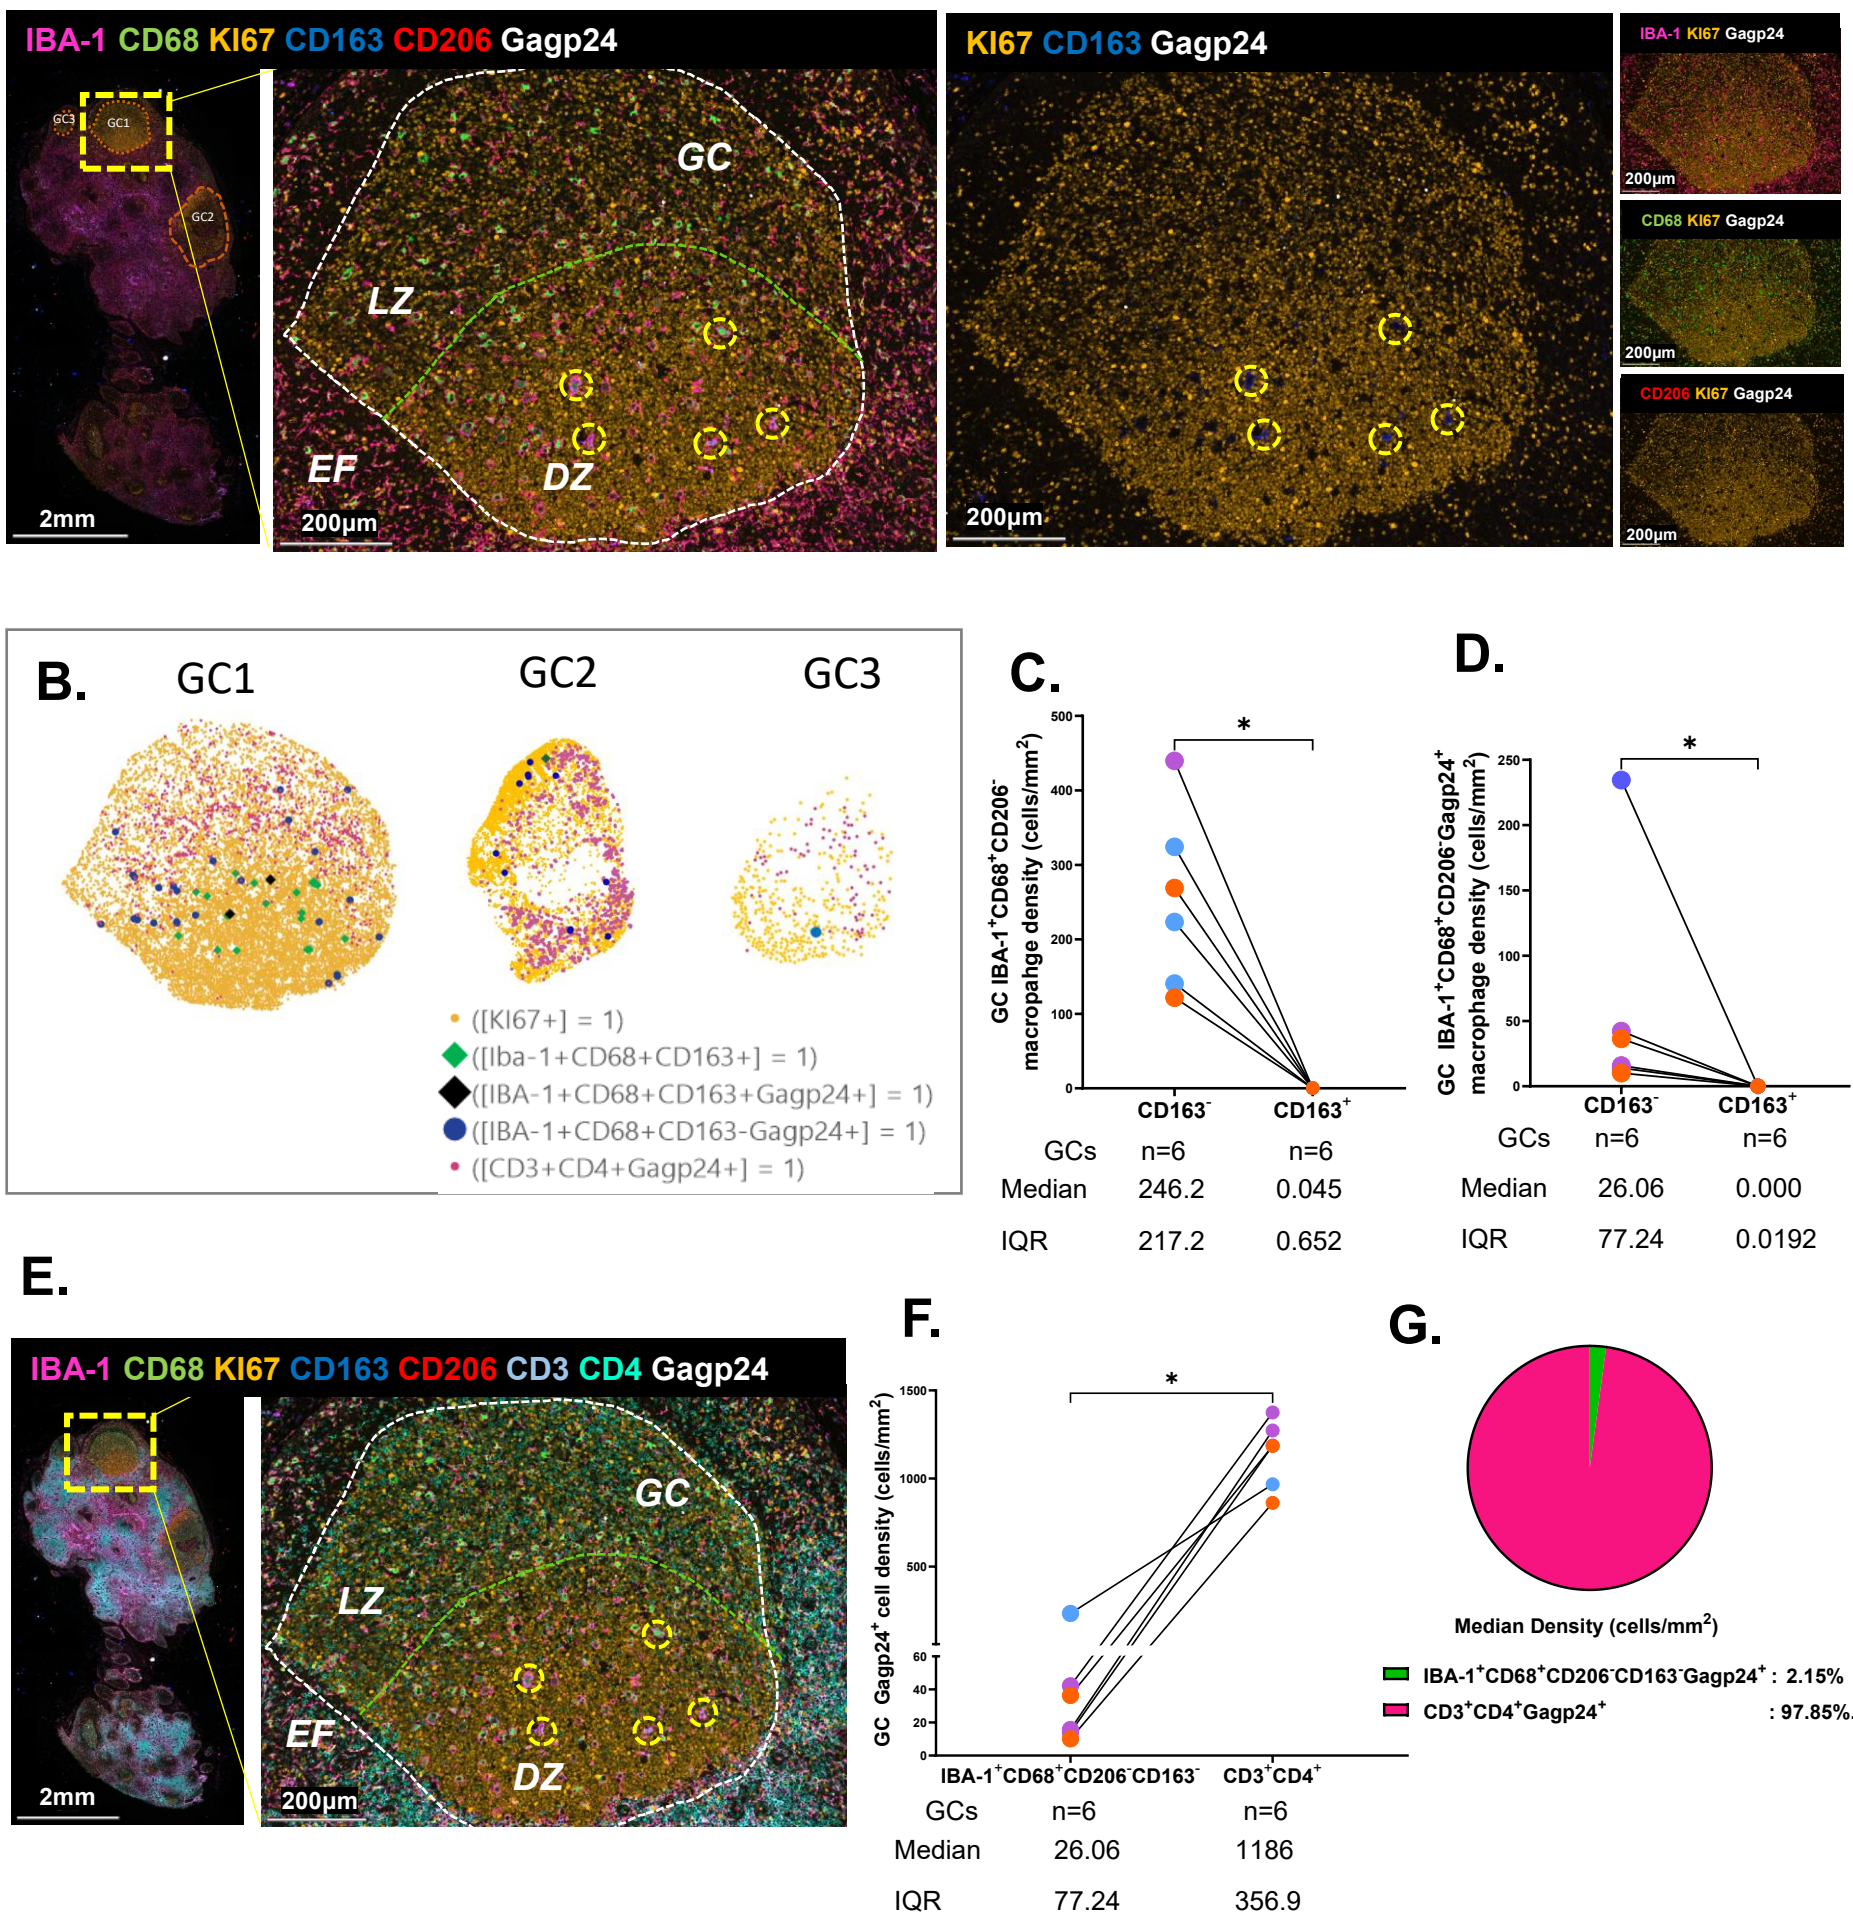

**Supplementary Figure 5. GC macrophage phenotyping in virally suppressed individuals by Lunaphore COMET and HALO image analysis.** (A) Multicolor IF merged image of a whole LN from a virally suppressed individual (left) obtained from the Lunaphore COMET showing IBA-1 (pink), CD68 (green), KI67 (orange), CD163 (dark blue), CD206 (red) and Gagp24 (white). The right inset shows the merged image of a magnified GC denoted by KI67 positivity, and individual channels for macrophage markers on the side. The white dashed line defined the GC and the green dotted line defines the light zone (LZ) and dark zone (DZ). Yellow circles indicate the IBA-1<sup>+</sup>CD68<sup>+</sup>CD206<sup>+</sup>CD163<sup>+</sup> GC macrophages. (B) HALO spatial plots of n=3 GCs as denoted in panel A as GC1, GC2 and GC3 showing spatial distributions of Gagp24<sup>+</sup> GC macrophage phenotypes and the observation of IBA-1<sup>+</sup>CD68<sup>+</sup>CD163<sup>+</sup> macrophages, and CD3<sup>+</sup>CD4<sup>+</sup> Gagp24<sup>+</sup> T cells as per the key. (C) HALO FISH IF quantitative analysis of GC macrophage density (cells/mm<sup>2</sup>) between IBA-1<sup>+</sup>CD68<sup>+</sup>CD206<sup>-</sup>CD163<sup>+</sup> and IBA-1<sup>+</sup>CD68<sup>+</sup>CD206<sup>+</sup>CD163<sup>-</sup> phenotypes and (D) Gagp24 positivity between these macrophage phenotypes. (E) Multicolor IF merged image of a whole LN with the CD3 (light blue) and CD4 (mint) (F) HALO FISH IF quantitative analysis of GC cell density (cells/mm<sup>2</sup>) between IBA-1<sup>+</sup>CD68<sup>+</sup>CD206<sup>+</sup>CD163<sup>-</sup>Gagp24<sup>+</sup> macrophages and CD3<sup>+</sup>CD4<sup>+</sup>Gagp24<sup>+</sup> T cells, with (G) the proportion of the median densities represented in the pie chart. Comparisons made using the Wilcoxon sum-ranked test where each colour represents an individual donor and each circle represents a GC. Images were acquired at 20x. Scale bars= 2mm and 200µm. The level of significance as follows p<0.05\*.



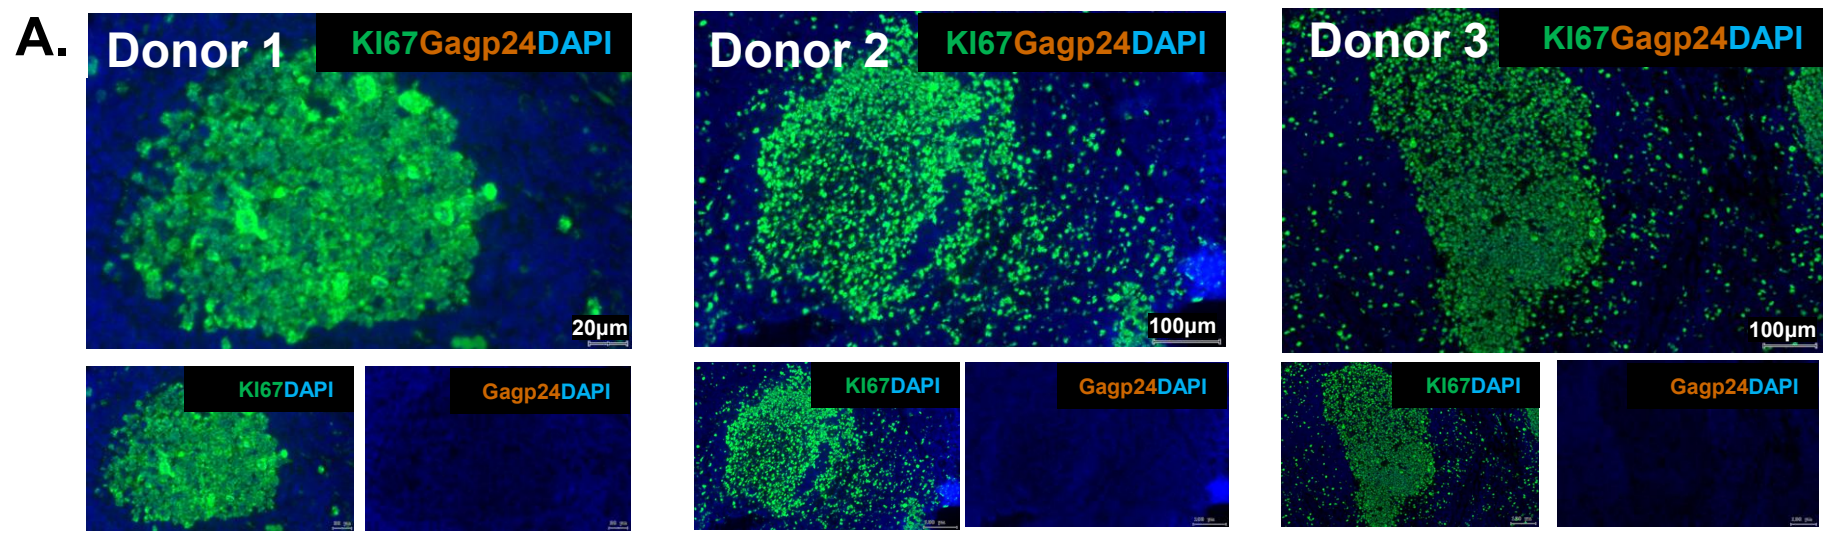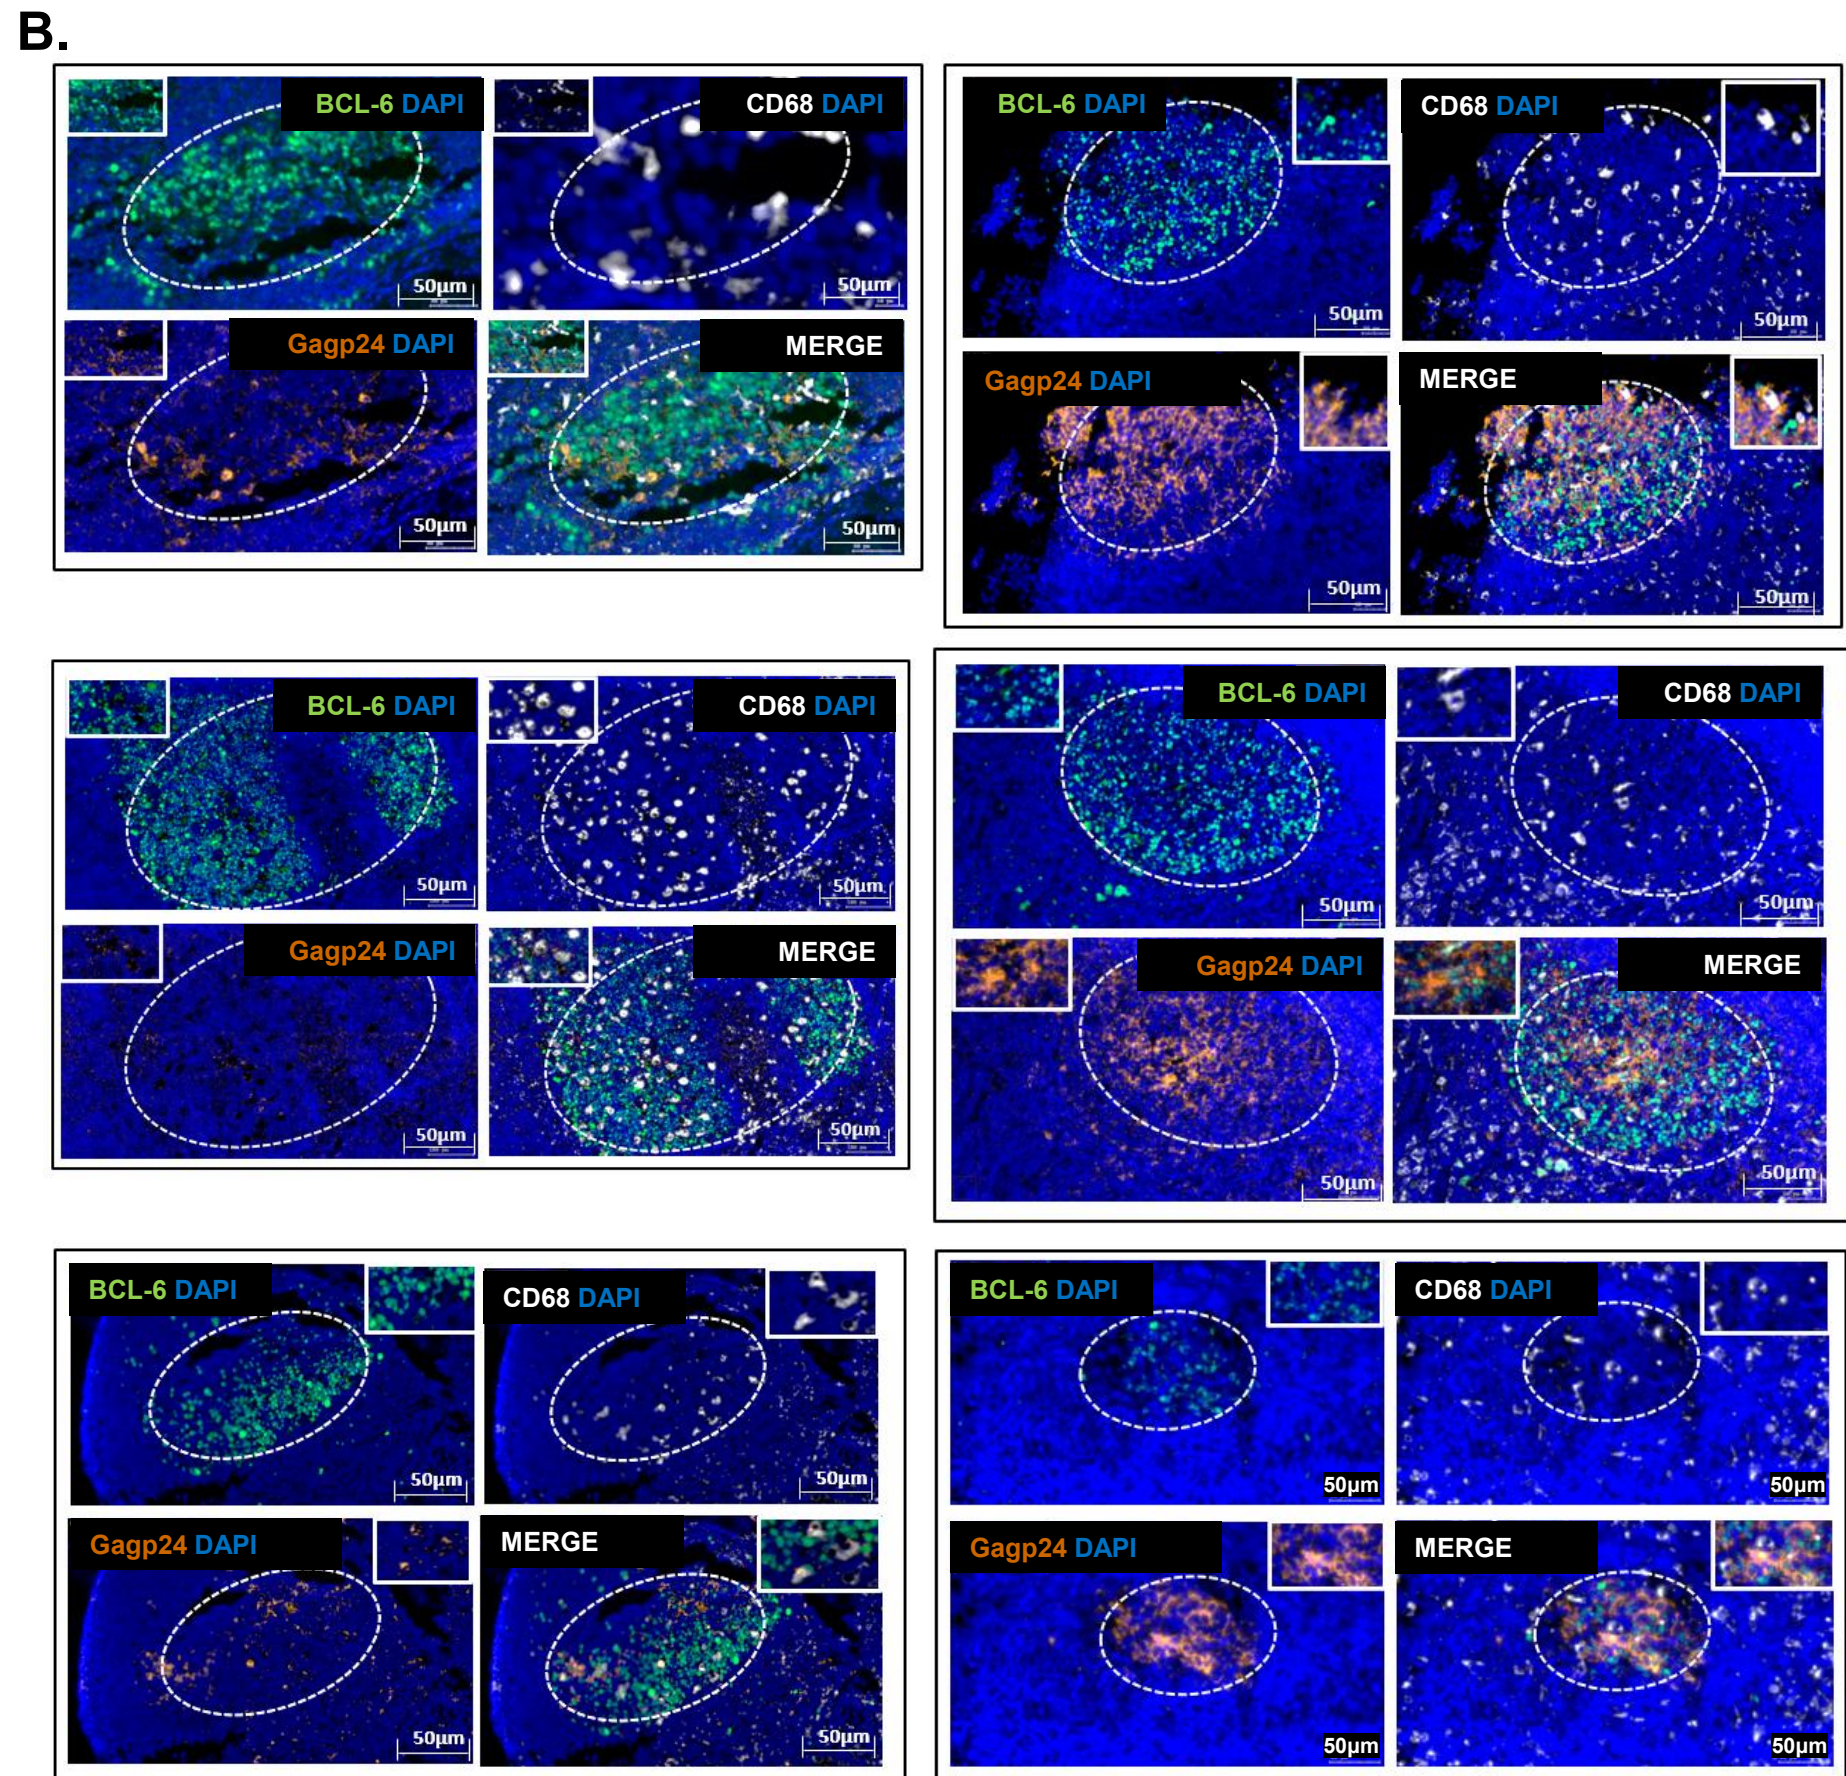

**Supplementary Figure 6. HIV Gagp24 antibody controls and additional representative images from donors**

**(A)** Representative Gagp24 negative control multicolor IF images from n=3 PLWoH of HIV Gagp24 antigen (brown) and KI67 (green) to define GCs. **(B)** Representative multicolor IF images from n=6 PLWH of GCs (white dashed ovals) indicated by BCL-6 (green) positivity and their respective expressions of CD68<sup>+</sup> (white) macrophages and HIV Gagp24 antigen (brown). Nuclei are stained with DAPI (blue). Images acquired at 40x. Scale bars= 20µm, 50µm and 100µm. .



**C.**

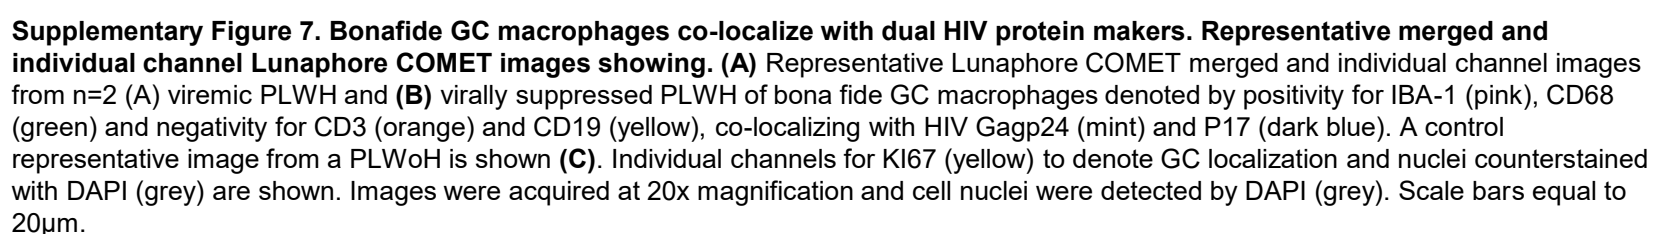



**A.**

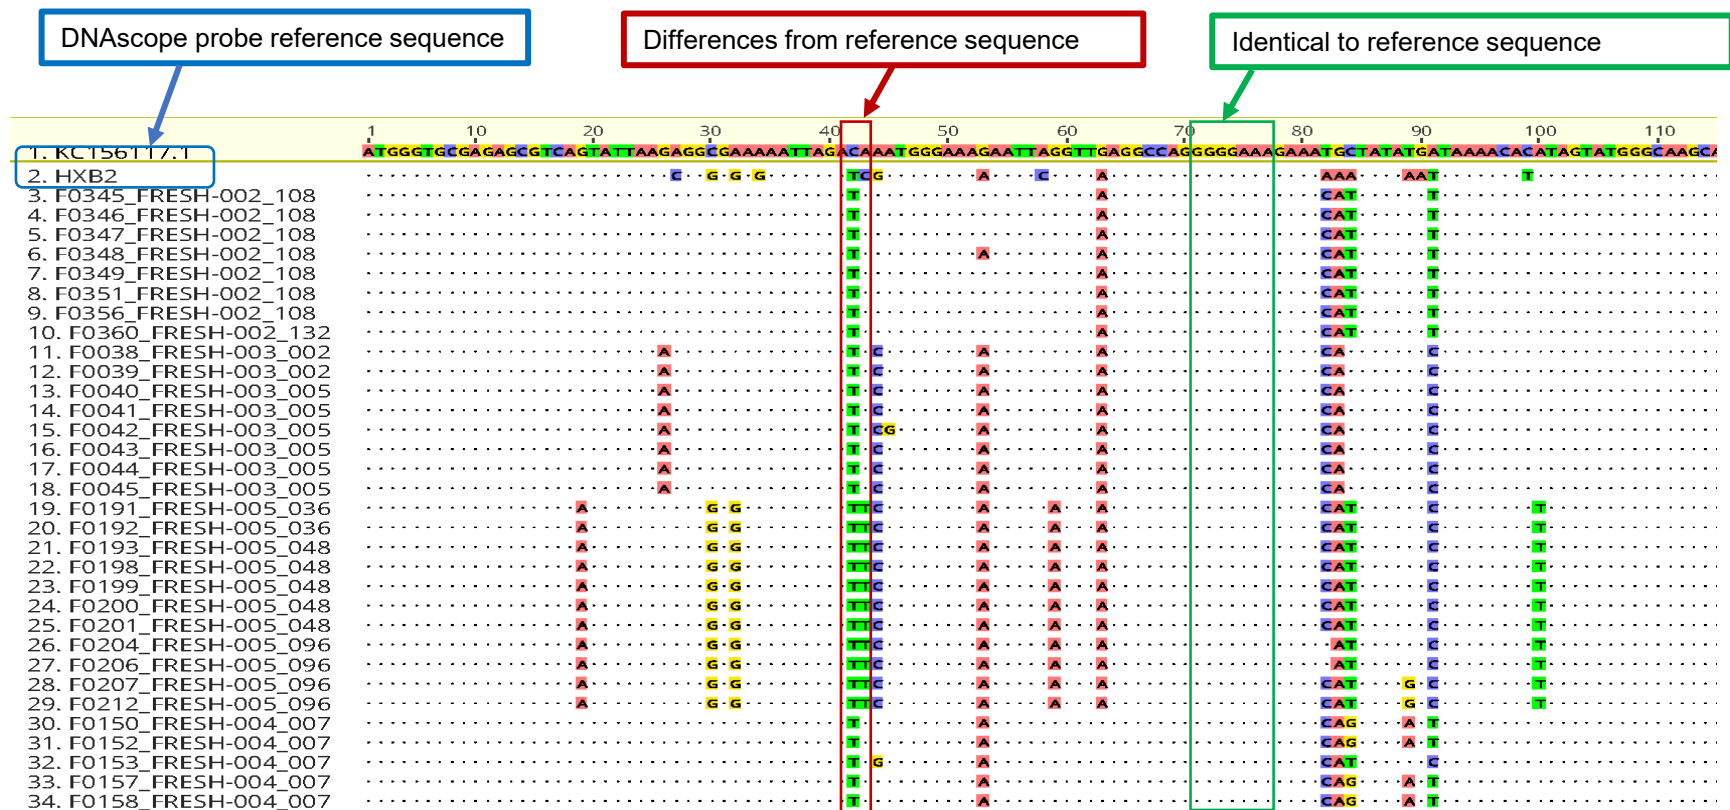

|                     | KC156117.1 | HXB2    | F0345_FRE... | F0346_FRE... | F0347_FRE... | F0348_FRE... | F0349_FRE... |
|---------------------|------------|---------|--------------|--------------|--------------|--------------|--------------|
| KC156117.1          |            |         |              |              |              |              |              |
| HXB2                | 88.948%    |         |              |              |              |              |              |
| F0345_FRESH-002_108 | 92.357%    | 88.119% |              |              |              |              |              |
| F0346_FRESH-002_108 | 92.242%    | 87.981% | 99.537%      |              |              |              |              |
| F0347_FRESH-002_108 | 92.242%    | 87.981% | 99.583%      | 99.537%      |              |              |              |
| F0348_FRESH-002_108 | 92.173%    | 87.958% | 99.374%      | 99.467%      | 99.467%      |              |              |
| F0349_FRESH-002_108 | 92.196%    | 88.027% | 99.652%      | 99.560%      | 99.652%      | 99.444%      |              |
| F0351_FRESH-002_108 | 92.311%    | 88.096% | 99.606%      | 99.699%      | 99.652%      | 99.490%      | 99.676%      |
| F0356_FRESH-002_108 | 92.127%    | 88.004% | 99.490%      | 99.398%      | 99.444%      | 99.328%      | 99.652%      |
| F0360_FRESH-002_132 | 92.334%    | 88.096% | 99.977%      | 99.513%      | 99.560%      | 99.351%      | 99.629%      |
| F0038_FRESH-003_002 | 91.342%    | 87.454% | 92.907%      | 92.837%      | 92.907%      | 92.791%      | 92.884%      |
| F0039_FRESH-003_002 | 91.388%    | 87.500% | 92.953%      | 92.884%      | 92.953%      | 92.837%      | 92.930%      |
| F0040_FRESH-003_005 | 91.365%    | 87.523% | 92.930%      | 92.860%      | 92.930%      | 92.814%      | 92.907%      |
| F0041_FRESH-003_005 | 91.388%    | 87.500% | 92.953%      | 92.884%      | 92.953%      | 92.837%      | 92.930%      |
| F0042_FRESH-003_005 | 91.365%    | 87.477% | 92.930%      | 92.860%      | 92.930%      | 92.814%      | 92.907%      |
| F0043_FRESH-003_005 | 91.388%    | 87.500% | 92.953%      | 92.884%      | 92.953%      | 92.837%      | 92.930%      |

% identity to reference sequence

## Nucleotide Statistics:

Length (mean): 4,297 bp

Sequences: 241

Identical Sites: 2,572 (58.0%)

Pairwise Identity: 92.8%

**B.**

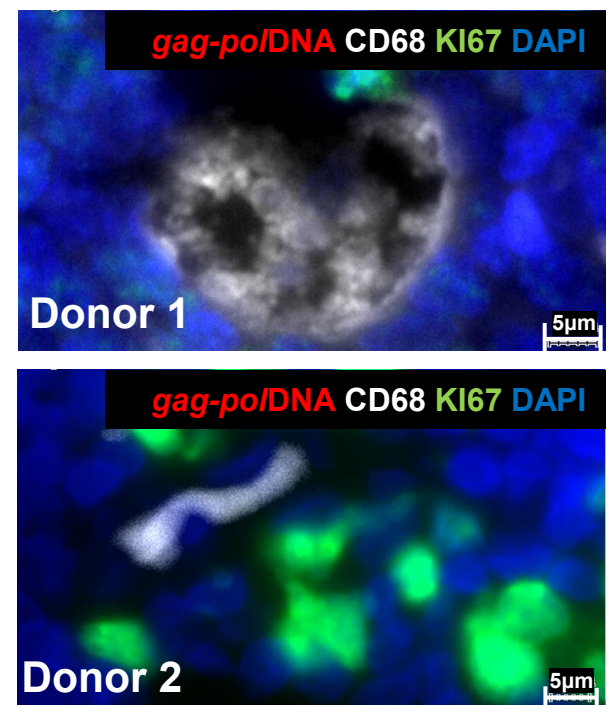

**Supplementary Figure 8. DNAscope validation.** (A) Alignment of DNAscope probe reference sequence to the sequences of our study cohort, validated with a 92.8% pairwise identity. (B) Representative DNAscope negative control images from n=2 PLWoH of *gag-pol*/ HIV DNA (red), CD68 (white) and KI67 (green). Cell nuclei were counterstained with DAPI (blue). Images acquired at 40x. Scale bars= 5µm.



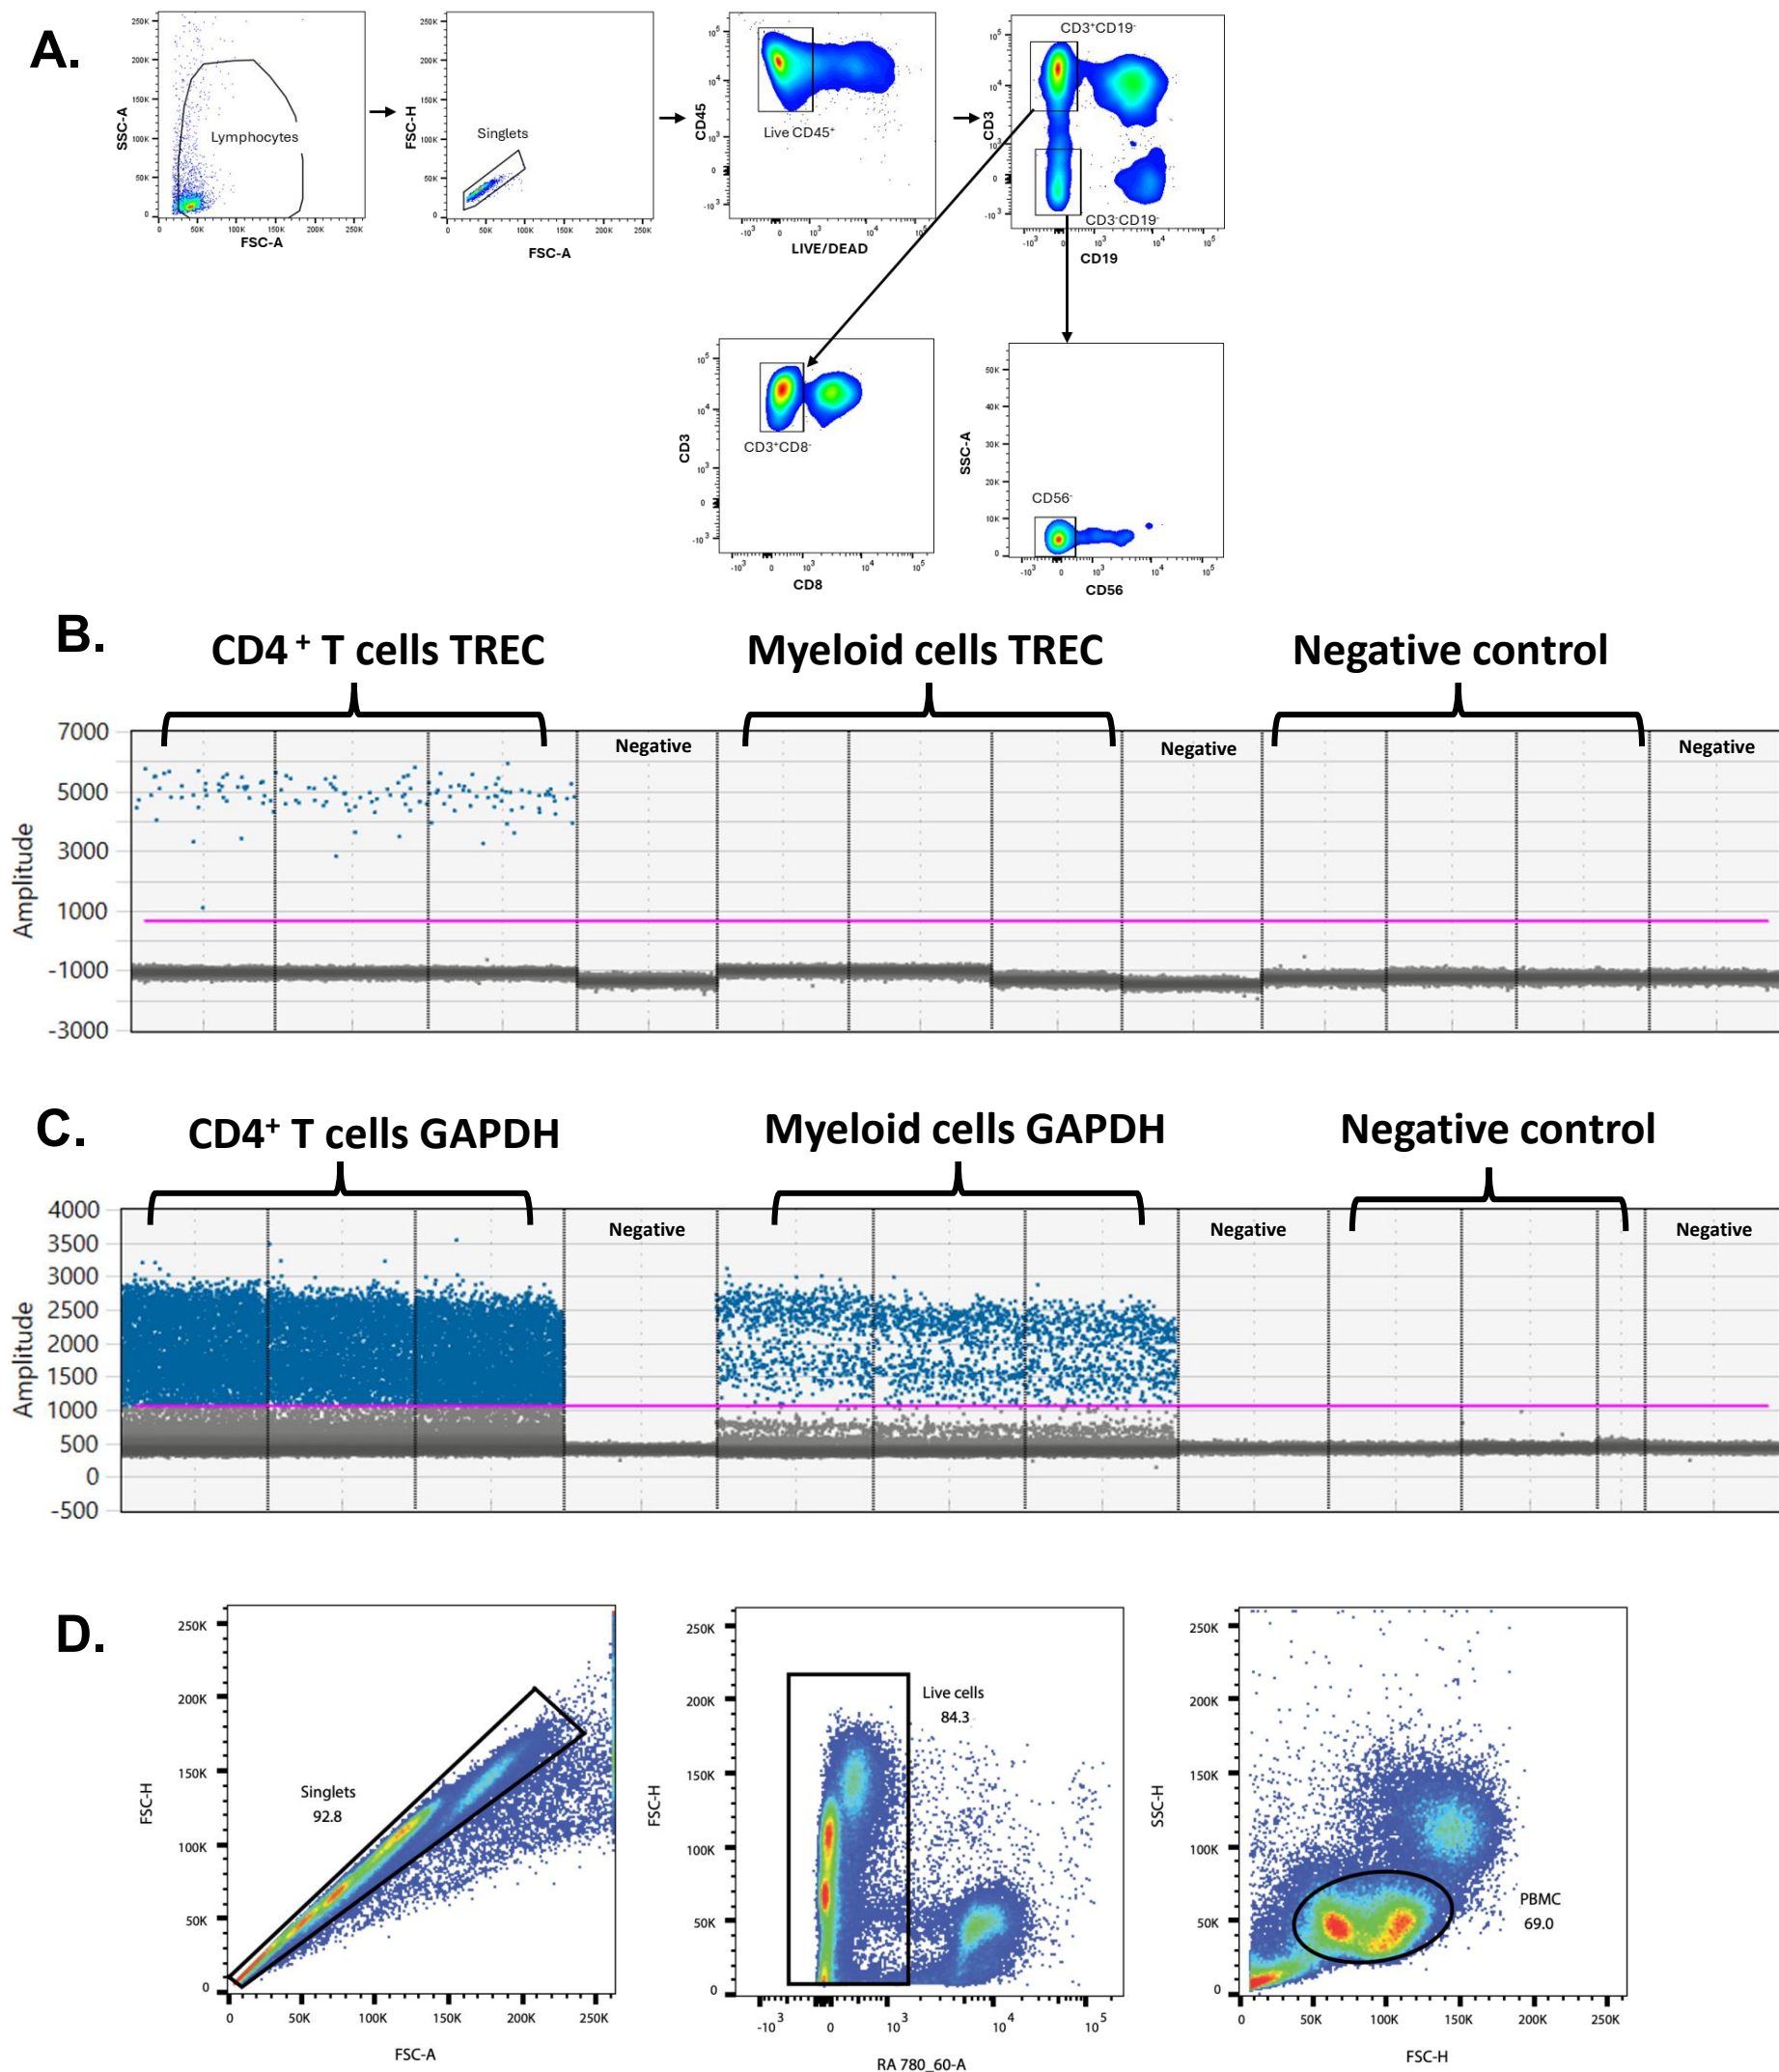

**Supplementary Figure 9. Isolation of myeloid and CD4<sup>+</sup> T cells from LNMCs and purity of myeloid cells. (A)** Flow cytometry gating strategy for CD4<sup>+</sup> T cells and myeloid cells from LNMCs for ddPCR. **(B)** TREC-2D Plot indicating no T cell contamination in the myeloid population. **(C)** House-keeping gene GAPDH expression in CD4<sup>+</sup> T cell and myeloid populations. **(D)** Flow cytometry gating of live PBMCs for the SQuHIVLa assay
